1  
2  
3  
4  
5  
6  
7  
8  
9  
10  
11  
12  
13  
14  
15  
16  
17  
18  
19  
20  
21  
22  
23  
24  
25  
26  
27  
28  
29  
30  
31  
32  
33  
34  
35  
36  
37  
38  
39  
40  
41

## CMKLR1-targeting peptide tracers for PET/MR imaging of breast cancer

Sarah Erdmann<sup>1</sup>, Lars Niederstadt<sup>1</sup>, Eva Jolanthe Koziol<sup>2,3,4</sup>, Juan Daniel Castillo Gómez<sup>2</sup>, Sonal Prasad<sup>2,3</sup>, Asja Wagener<sup>1</sup>, Jan Lennart von Hacht<sup>1</sup>, Sandy Hallmann<sup>1</sup>, Samantha Exner<sup>1</sup>, Sebastian Bandholtz<sup>1</sup>, Nicola Beindorff<sup>3</sup>, Winfried Brenner<sup>2,3,5</sup>, Carsten Grötzing<sup>1,2,5</sup>

<sup>1</sup> Department of Hepatology and Gastroenterology, Molecular Cancer Research Center (MKFZ), Charité – Universitätsmedizin Berlin, Campus Virchow-Klinikum, 13353 Berlin, Germany; <sup>2</sup> Department of Nuclear Medicine, Charité – Universitätsmedizin Berlin, Campus Virchow-Klinikum, 13353 Berlin, Germany; <sup>3</sup> Berlin Experimental Radionuclide Imaging Center (BERIC), Charité – Universitätsmedizin Berlin, Campus Virchow-Klinikum, 13353 Berlin, <sup>4</sup> German Cancer Research Center (DKFZ) Heidelberg, Germany, <sup>5</sup> German Cancer Consortium (DKTK), Berlin, Germany

**Running title:** CMKLR1 PET/MRI in a breast cancer xenograft model

**Corresponding author:** Dr. Carsten Grötzing  
Charité - Universitätsmedizin Berlin  
Campus Virchow-Klinikum  
Department of Hepatology and Gastroenterology and  
Molecular Cancer Research Center (MKFZ)  
Augustenburger Platz 1  
D-13353 Berlin  
Germany  
Phone: +49 30 450559488  
Fax: +49 30 45055997  
Email: [carsten.groetzing@charite.de](mailto:carsten.groetzing@charite.de)

## 42 **Abstract**

43 Molecular targeting remains to be a promising approach in cancer medicine. Knowledge  
44 about molecular properties such as overexpression of G protein-coupled receptors  
45 (GPCRs) is thereby offering a powerful tool for tumor-selective imaging and treatment of  
46 cancer cells. We utilized chemerin-based peptides for CMKLR1 receptor targeting in a  
47 breast cancer xenograft model. By conjugation with radiolabeled chelator 1,4,7,10-  
48 tetraazacyclododecane-1,4,7,10-tetraacetic acid (DOTA), we obtained a family of highly  
49 specific and affine tracers for hybrid *in vivo* imaging with positron emission tomography  
50 (PET)/ magnetic resonance (MR) and concomitant biodistribution studies.

## 51 **Methods**

52 We developed five highly specific and affine peptide tracers targeting CMKLR1 by linker-  
53 based conjugation of chemerin peptide analogs (CG34 and CG36) with radiolabeled  
54 (<sup>68</sup>Ga) chelator DOTA. Our established xenograft model with target-positive DU4475 and  
55 negative A549 tumors in immunodeficient nude mice enabled CMKLR1-specific imaging  
56 *in vivo*. Therefore, we acquired small animal PET/MR images, assessed biodistribution by  
57 *ex vivo* measurements and investigated the tracer specificity by blocking experiments.

## 58 **Results**

59 The family of five CMKLR1-targeting peptide tracers demonstrated high biological activity  
60 and affinity *in vitro* with EC<sub>50</sub> and IC<sub>50</sub> values being below 2 nM. Our target-positive  
61 (DU4475) and target-negative (A549) xenograft model could be confirmed by *ex vivo*  
62 analysis of CMKLR1 expression and binding. After preliminary PET imaging, the three  
63 most promising tracers <sup>68</sup>Ga-DOTA-AHX-CG34, <sup>68</sup>Ga-DOTA-KCap-CG34 and <sup>68</sup>Ga-  
64 DOTA-ADX-CG34 with apparent DU4475 tumor uptake were further analyzed. Hybrid  
65 PET/MR imaging along with concomitant biodistribution studies revealed distinct

66 CMKLR1-specific uptake (5.1% IA/g, 4.5% IA/g and 6.2% IA/g 1 h post-injection) of our  
67 targeted tracers in DU4475 tumor tissue. More strikingly, the tumor uptake could be  
68 blocked by excess of unlabeled peptide (6.4-fold, 7.2-fold and 3.4-fold 1 h post-injection)  
69 and further confirmed the CMKLR1 specificity. As our five tracers, each with particular  
70 degree of hydrophobicity, showed different results regarding tumor uptake and organ  
71 distribution, we identified these three tracers with moderate, balanced properties to be the  
72 most potent in receptor-mediated tumor targeting.

### 73 **Conclusion**

74 With the breast cancer cell line DU4475, we established a model endogenously  
75 expressing our target CMKLR1 to evaluate our chemerin-based peptide tracers as highly  
76 affine and specific targeting agents. Eventually, we demonstrated the applicability of our  
77 <sup>68</sup>Ga-labeled tracers by visualizing CMKLR1-positive breast cancer xenografts in PET/MR  
78 imaging and thus developed promising theranostics for tumor treatment.

79

### 80 **Keywords**

81 Tumor targeting, PET tracer, Chemokine-like receptor 1, peptide ligand, breast cancer

82

83

## 84 **Introduction**

85 Molecular targeting remains to be one of the most promising approaches in cancer  
86 diagnosis and therapy. Targeted tracers in combination with highly sensitive positron  
87 emission tomography (PET) may facilitate early tumor recognition and staging staging as  
88 well as therapeutic stratification and response monitoring. While the most widely used  
89 PET tracer  $^{18}\text{F}$ -fluoro-deoxyglucose ( $^{18}\text{F}$ -FDG) enables tumor detection by glucose  
90 metabolic imaging and hence also visualizes non-neoplastic cells and tissues, tumor-  
91 specific targeting is aiming to provide more sensitive and precise imaging results with less  
92 non-specific background [1]. Preferred molecular targets are considered to localize at the  
93 cell surface or within the extracellular matrix (ECM), as tracers can reach them without  
94 crossing the cell membrane. Consequently, transmembrane receptors, transporters and  
95 other antigens associated with the cell membrane as well as ECM proteins such as  
96 fibronectin or tenascin can be regarded as potential targets [2]. With either high  
97 overexpression or even exclusive target expression in tumor cells, appropriately targeted  
98 tracers may lead to improved tumor-to-background ratios and thus higher diagnostic  
99 sensitivity and specificity.

100 Several G protein-coupled receptors (GPCRs) have been identified as tumor-specific  
101 targets. Beside other well-characterized cell surface proteins such as growth factor  
102 receptors (e.g. epithelial growth factor receptor, EGFR [3]), transmembrane glycoproteins  
103 (e.g. prostate-specific membrane antigen, PSMA [4]) and transmembrane receptors (e.g.  
104 integrins [5]), GPCRs have emerged as molecular targets in the field of cancer care [6, 7].  
105 Thus, upregulated receptor expression in cancer cells can be utilized for tracer-based  
106 tumor imaging, for pharmacological intervention through GPCR signaling modification and  
107 for peptide receptor radionuclide therapy (PRRT). Unlike antibodies, small-sized receptor

108 ligands such as peptides have a number of advantages regarding their *in vivo* circulation,  
109 biodistribution, tumor penetration and low immunogenic potential [8-11].

110 One of the earliest successful receptor-based strategies in cancer targeting was the use  
111 of somatostatin analogs (SSA) for diagnostic imaging and treatment of somatostatin  
112 receptor-bearing tumors. For human somatostatin receptor (SSTR), a G protein-coupled  
113 transmembrane glycoprotein, five subtypes (SSTR1-SSTR5) are known to be expressed  
114 in neuroendocrine tumors (NETs) [12, 13]. With a prevalence of 80 to 100% and the  
115 highest abundance for SSTR2 expression, NETs of the gastroenteropancreatic tract  
116 (75%, compared to 25% NETs in lungs) are suited for SSTR targeting [14, 15]. While  $^{111}\text{In}$ -  
117 pentetreotide ( $^{111}\text{In}$ -DTPA-octreotide) for single photon emission computed tomography  
118 (SPECT) was the first SSTR tracer with widespread clinical use [16, 17],  $^{68}\text{Ga}$ -DOTATOC  
119 ( $^{68}\text{Ga}$ -DOTA-Tyr<sup>3</sup>-octreotide) for PET and  $^{177}\text{Lu}$ -DOTATATE ( $^{177}\text{Lu}$ -DOTA-Tyr<sup>3</sup>-  
120 octreotate) for PRRT have now become available [18-20].

121 Chemokine-like receptor 1 (CMKLR1), a G protein-coupled receptor, and its ligand  
122 chemerin are known to be involved in inflammation, adipogenesis and glucose  
123 metabolism [21, 22]. Dysregulation of the receptor-ligand system has been linked to  
124 several pathologies such as metabolic syndrome and cardiovascular diseases [23, 24].  
125 Apart from a study demonstrating recruitment of immune cells and hence an antitumor  
126 response in melanoma, the role of the chemoattractant chemerin and its receptors in  
127 cancer is largely unknown [25, 26]. Our lab has recently characterized CMKLR1 as a  
128 target overexpressed in breast cancer, esophageal squamous cell carcinoma (ESCC) and  
129 pancreatic adenocarcinoma (manuscript in preparation). Increased CMKLR1 expression,  
130 chemerin-mediated tumor cell migration and invasion in ESCC were also found by Kumar  
131 et al. [27]. Likewise, CMKLR1 has been implicated in neuroblastoma proliferation [28],

132 hepatocellular carcinoma metastasis [29] and migration/invasion of gastric cancer [30].  
133 CMKLR1 may therefore be a promising target for molecular imaging and targeted  
134 radionuclide therapy in overexpressing tumor entities. This study evaluated the potential  
135 of a family of novel CMKLR1 peptide-DOTA tracers for PET/MR imaging in a breast  
136 cancer animal model.

137

## 138 **Material and Methods**

### 139 *Peptides*

140 All peptides and DOTA-peptide conjugates were from peptides&elephants (Hennigsdorf,  
141 Germany). They were analyzed by mass spectrometry to confirm the presence of the  
142 correct molecular mass. Peptides and peptide conjugates were used at a purity of greater  
143 than 95%. Analysis data for peptides and peptide conjugates have been deposited in an  
144 open data repository for public access: <http://doi.org/10.5281/zenodo.2591417>

### 145 *Cell culture*

146 For *in vitro* analysis, HEK293a stably transfected with huCMKLR1 and G $_{\alpha 16}$  were used.  
147 For the *in vivo* mouse model, the human breast cancer cell line DU4475 with endogenous  
148 CMKLR1 expression and the target-negative human lung carcinoma cell line A549 were  
149 used. All cell lines were obtained from ATCC/LGC Standards (Wesel, Germany) and were  
150 cultured in RPMI1640 medium containing 10% fetal bovine serum (both from Biochrom,  
151 Berlin, Germany) and, in case of transfected cells, selection agents G418 (Biochrom) and  
152 zeocin (Invitrogen, Carlsbad, USA).

### 153 *Xenografts*

154 For *in vivo* experiments, at least 8-week-old female athymic NMRI-*Foxn1<sup>nu</sup>* /*Foxn1<sup>nu</sup>* mice  
155 (Janvier Labs, Saint-Berthevin, France) were used. Animal care followed institutional  
156 guidelines and all experiments were approved by local animal research authorities. For  
157 the generation of tumor xenografts, 5 x 10<sup>6</sup> cells of both DU4475 and A549 cells were  
158 inoculated subcutaneously into the left and right shoulder, respectively (1:1 PBS/Matrigel  
159 Basement Membrane Matrix High Concentration, Corning, Corning, USA). Tumors were  
160 allowed to grow for two to four weeks (tumor volume > 100 mm<sup>3</sup>) after cell inoculation.

### 161 *Immunofluorescence*

162 For immunofluorescent staining of tumor tissue, the frozen xenografts were embedded in  
163 Tissue-Tek O.C.T Compound (Sakura Finetek, Torrance, USA), trimmed by cryostat (12-  
164 18  $\mu\text{m}$ ) and transferred on glass slides (Superfrost, Thermo Fisher Scientific, Waltham,  
165 USA). Xenograft sections were fixed with 1:1 methanol/acetone for two minutes and air-  
166 dried. After washing with PBS (Biochrom, Berlin, Germany), sections were blocked with  
167 2% milk powder (blotting grade; Bio-Rad Laboratories, Hercules, USA) in PBS for  
168 30 minutes. Sections were incubated with the primary anti-CMKLR1 antibody developed  
169 in our lab (#21-86; polyclonal from rabbit, immunogenic peptide sequence:  
170 SSWPTHSQMDPVG Y; 3  $\mu\text{g}/\text{mL}$  diluted in 0.1% BSA in PBS) in a wet chamber over night  
171 at 4 °C. After washing, sections were incubated with the secondary antibody goat-anti-  
172 rabbit-Cy2 (Jackson ImmunoResearch, West Grove, USA; 7.5  $\mu\text{g}/\text{mL}$  diluted in 0.1% BSA  
173 in PBS) for one hour. After washing with TBS, nuclei staining with 1  $\mu\text{M}$  SytoxOrange  
174 (Thermo Fisher Scientific, Waltham, USA) in TBS followed. Finally, the cryosections were  
175 fixed with 96% ethanol for two minutes, embedded with Immu-Mount (Thermo Fisher  
176 Scientific, Waltham, USA) and analyzed with a confocal laser-scanning microscope  
177 (LSM510, Carl Zeiss, Jena, Germany).

#### 178 *Calcium mobilization assay*

179 Optical ViewPlate 96-well microplates (PerkinElmer, Waltham, USA) were coated with  
180 poly-D-lysine (10  $\mu\text{g}/\text{mL}$ , 50  $\mu\text{L}/\text{well}$ ) for 30 minutes at 37 °C, washed with PBS and air  
181 dried before seeding 40,000 HEK293a huCMKLR1  $G_{\alpha 16}$  cells per well. The next day, cells  
182 were starved with serum-free medium for 30 minutes and incubated with loading medium  
183 consisting of serum-free medium with 2.5 mM probenidol (Sigma-Aldrich, St. Louis, USA)  
184 and 2  $\mu\text{M}$  Fluo-4 AM (Thermo Fisher Scientific, Waltham, USA). After a loading time of 45  
185 minutes, cells were washed with 100  $\mu\text{L}$  C1 buffer (130 mM NaCl, 5 mM KCl, 10 mM Na-



186 Hepes, 2 mM CaCl<sub>2</sub>, 10 mM glucose) followed by 20 minutes of incubation in the dark.  
187 After another washing and incubation cycle, the cell plate was placed into the CellLux  
188 Calcium Imaging System (PerkinElmer, Waltham, USA) and the assay was performed  
189 automatically according to the following protocol. After a baseline measurement for  
190 30 seconds, the ligands (prepared in C1 buffer with 0.5% BSA in double concentration  
191 and pipetted in a U-bottom plate) were added on top of the cells and the fluorescence  
192 intensity was recorded for a further 60 seconds. Obtained raw data were analyzed using  
193 AssayPro (PerkinElmer, Waltham, USA). After spatial uniformity correction, maximum  
194 response values (F) were normalized to baseline values (F<sub>0</sub>) of each well using the  
195 following equation:  $\text{response} = \Delta F/F_0 = (F - F_0)/F_0$ .

#### 196 *Iodination of chemerin-9*

197 Radioactive iodination of chemerin-9 was performed by the chloramine T method [31]. For  
198 labeling, 10 nmol of chemerin-9 in 25  $\mu$ L iodination buffer (0.5 M sodium phosphate,  
199 pH 7.4) were mixed with 1 mCi carrier-free Na<sup>125</sup>I (NEZ033L010MC, PerkinElmer,  
200 Waltham, USA) in an HPLC glass vial with microvolume insert. The reaction was started  
201 by adding 4  $\mu$ L chloramine T (1 mg/mL in water). After 20-30 seconds, 4  $\mu$ L of sodium  
202 metabisulfite (2 mg/mL in water) were added to stop the iodination. HPLC purification was  
203 performed to separate unlabeled from labeled radioactive peptide on an Agilent ZORBAX  
204 300 Extend-C18 column using a gradient from 20 to 50% acetonitrile (+0.1% TFA) against  
205 water (+0.1% TFA) for 20 minutes. First, 1-2  $\mu$ L of the reaction mixture were preanalyzed  
206 to determine the retention time of the radioactive peptide. This fraction was then collected  
207 during the main run, diluted with radioactive binding buffer to prevent radiolysis, aliquoted  
208 and stored at -20 °C.

#### 209 *Competitive binding studies*

210 Competitive binding studies were performed with cell membrane preparations. Therefore,  
211 cellular monolayer cultures were washed with pre-warmed PBS and dissociated in ice-  
212 cold PBS with 5 mM EGTA (Carl Roth, Karlsruhe, Germany) with the help of a cell scraper.  
213 Tumor tissue was homogenized with a rotor-stator homogenizer (Ultra-Turrax T8, IKA-  
214 Werke, Staufen, Germany) in ice-cold PBS with 5 mM EGTA. Both, cell and tissue  
215 homogenates were centrifuged for ten minutes (4 °C, 200 x g), and supernatants were  
216 discarded. Pellets were resuspended in 5 mL of membrane isolation buffer (5 mM TrisHCl  
217 pH 7.6, 5 mM MgCl<sub>2</sub>, 1 mM EGTA, protease inhibitor cocktail cOmplete [Roche Applied  
218 Science, Penzberg, Germany]) with a glass dounce tissue grinder (Wheaton, Millville,  
219 USA) and further homogenized by moving the pestle up and down (approx. 30 times).  
220 After centrifugation for 30 minutes (4 °C und 40.000 g), the process was repeated, before  
221 cell and tissue homogenates were resuspended in 1 mL membrane isolation buffer,  
222 aliquoted and stored at -80 °C. For competitive binding, 5 µg of isolated membrane in  
223 25 µL binding buffer (50 mM 4-(2-hydroxyethyl)-1-piperazineethanesulfonic acid (HEPES)  
224 pH 7.4, 5 mM MgCl<sub>2</sub>, 1 mM CaCl<sub>2</sub>, 0.5% BSA, protease inhibitor cocktail cOmplete) were  
225 incubated with increasing concentrations of non-radioactive peptide (2-fold concentrated  
226 in 50 µL) and 100,000 cpm of <sup>125</sup>I-chemerin-9 (in 25 µL binding buffer). After one hour of  
227 incubation at 37 °C, the mixture was transferred to 96-well filter plates (MultiScreen<sub>HTS</sub> FB  
228 Filter Plate 1.0 µm, Millipore, Billerica, USA), unbound peptide was withdrawn by suction  
229 and the plate was washed four times with cold washing buffer (50 mM Tris-HCl pH 7.4,  
230 125 mM NaCl, 0.05% BSA). After drying the filter plate, 40 µL scintillation cocktail (Ultima  
231 Gold F, Perkin Elmer, Waltham, USA) per well was added and radioactivity was measured  
232 by liquid scintillation counting (MicroBeta<sup>2</sup> Microplate Counter, PerkinElmer, Waltham,  
233 USA).

234 *Radiochemical labelling*

235 Radiolabeling experiments were performed on a Modular Lab PharmTracer synthesis  
236 module (Eckert & Ziegler, Berlin, Germany) which allows fully automated cassette-based  
237 labeling of gallium tracers utilizing a pharmaceutical grade  $^{68}\text{Ge}/^{68}\text{Ga}$  generator  
238 (GalliaPharm, 1.85 GBq, good manufacturing practice (GMP)-certified; Eckert & Ziegler  
239 GmbH, Berlin, Germany). Cassettes were GMP-certified and sterile. They were used  
240 without pre-conditioning of the cartridges. The gallium generator was eluted with aqueous  
241 HCl (0.1 M, 7 mL) and the eluate was purified on an ion-exchange cartridge followed by  
242 elution using 1 mL of 0.1 M HCl in acetone. The peptide-DOTA conjugate (50  $\mu\text{g}$  from a  
243 stock solution 1 mg/mL in 10% DMSO, 90% water) was mixed with 500  $\mu\text{L}$  0.1 M HEPES  
244 buffer (pH 7) and heated for 500 s at 95 °C. After the reaction, the mixture was passed  
245 through a C-18 cartridge for purification and the tracer was eluted from the cartridge with  
246 ethanol. For injection, the resulting solution was diluted with saline to  $\leq 10\%$  ethanol.

247 *PET/MR imaging*

248 Positron emission tomography (PET)/magnetic resonance imaging (MRI) (1 Tesla  
249 nanoScan PET/MRI, Mediso, Hungary) was performed at the Berlin Experimental  
250 Radionuclide Imaging Center (BERIC), Charité – Universitätsmedizin Berlin. A dedicated  
251 mouse whole-body coil was used for RF-transmission and signal receiving. Mice were  
252 anesthetized with general anaesthesia (1-2% isoflurane/0.5 L/min oxygen). Body  
253 temperature was maintained at 37 °C during the time of imaging by using a heated bed  
254 aperture. Anatomic whole-body MRI scans were acquired using a high-resolution T2-  
255 weighted 2D fast spin echo sequence (T2 FSE 2D) with the following parameters: TR =  
256 8700 ms; TE = 103 ms; slice thickness/gap = 1.1 mm/ 0.1 mm; matrix = 256 x 256 mm;

257 external averages = 5 and number of excitations = 2. PET scans in list mode were  
258 acquired either for 30 minutes one and two hours after intravenous injection or for 90  
259 minutes of dynamic imaging starting directly before injection of 0.15 mL of tracer,  
260 corresponding to a  $^{68}\text{Ga}$  activity of approximately 20 MBq for static 1 h-images and 2 h-  
261 images and 15 MBq for kinetic imaging. To determine the effect of unlabeled ligand on  
262 the tumor uptake, 200 nmol CG34 peptide (50-fold excess) was co-injected. Static PET  
263 images were reconstructed from the raw data as one image (1 x 1800 s) and dynamic  
264 PET images were reconstructed with the image sequence 9 x 600 s. The uptake value  
265 ( $\text{kBq}/\text{cm}^3$ ) in the tumor tissue was determined by manual contouring of a volume of interest  
266 (VOI) of the PET images using PMOD 3.610 (PMOD Technologies, Zürich, Switzerland).

#### 267 *Biodistribution studies*

268 Tumor-bearing mice were injected with approximately 10 MBq of  $^{68}\text{Ga}$ -DOTA-peptide to  
269 the tail vein via a catheter. Mice were sacrificed and dissected one or two hours after  
270 injection. Tumor, blood, stomach, pancreas, small intestine, colon, liver, spleen, kidney,  
271 heart, lung, muscle and femur samples were weighed and uptake of radioactivity was  
272 measured by a gamma counter. To determine the effect of unlabeled ligand on the tumor  
273 uptake, 200 nmol CG34 peptide (100-fold excess) was co-injected.

#### 274 *Statistical analysis*

275 All statistical analyses were performed using GraphPad Prism 5.04.  $\text{EC}_{50}/\text{IC}_{50}$  values were  
276 determined by nonlinear sigmoidal curve fitting with variable slope setting, and normalized  
277 response for competitive binding results. Multiple group comparisons were done by a two-  
278 way ANOVA and Bonferroni post hoc test. All presented data are based on independent  
279 experiments. Normalizations and statistics are further defined in each figure legend.

#### 280 *Data availability*

281 Numerical data for all experiments (xlsx file) have been deposited in an open data  
282 repository for public access: <http://doi.org/10.5281/zenodo.2591417>

283

284 **Results**

285

286 **Characterization of an endogenously CMKLR1-expressing tumor mouse model**

287 As models for tracer testing, the human breast cancer cell line DU4475, which  
288 endogenously expresses high levels of CMKLR, and the target-negative human lung  
289 cancer cell line A549 were chosen to induce subcutaneous xenograft tumors in nude mice.  
290 Analysis of *ex vivo* tumor tissue confirmed CMKLR1 expression in DU4475 xenografts by  
291 immunostaining, whereas A549 tumors showed no detectable antigen (Figure 1A). To  
292 confirm presence of receptor protein in these xenograft tissues with an independent  
293 method, radioligand binding studies were performed on membrane preparations of  
294 cultured cells and *ex vivo* tissue (Figure 1B). Receptor binding of <sup>125</sup>I-labeled chemerin-9  
295 in DU4475 cell membrane preparations (*in vitro*) led to values around 200 cpm  
296 (assessment of radioactivity by liquid scintillation counting) which could be significantly  
297 blocked (approx. 80 cpm) by an excess of the unlabeled peptide (1 μM). Membranes  
298 isolated from DU4475 tumors (*ex vivo*) bound less labeled peptide (approx. 115 cpm) but  
299 still exhibited specific binding, as 1 μM chemerin-9 clearly displaced about 50% of the  
300 bound activity (60 cpm). In contrast, membrane preparations from A549 cells xenograft  
301 tumors showed no specific binding.

302

303 **Characterization of high potency, high affinity CMKLR1-targeting peptide-DOTA**  
304 **conjugates**

305 Chemical design of five tracers for CMKLR1 targeting involved two peptide analogs of the  
306 natural CMKLR1 ligand chemerin (CG34 or CG36) that were attached to the chelator  
307 1,4,7,10-tetraazacyclododecane-1,4,7,10-tetraacetic acid (DOTA) via one of four different

308 chemical linkers: 4,7,10-trioxatridecan-succinamic acid (TTDS), 6-aminohexanoic acid  
309 (AHX), N- $\epsilon$ -capryloyl-lysine (KCap) and 10-aminodecanoic acid (ADX) (Figure 2A). Due  
310 to their chemical composition, both peptide analogs as well as the four linkers exhibit  
311 distinct characteristics such as different length and hydrophobicity. In Figure 2A, these  
312 conjugate components are depicted in different colors (reddish colors indicate more  
313 hydrophobic properties and greenish colors more hydrophilicity).

314  
315 *In vitro* characterization of the probes was realized by activity and radioligand binding  
316 studies in HEK293a cells stably transfected with CMKLR1. Ligand-induced receptor  
317 activation as intracellular Ca<sup>2+</sup> flux was quantified in an intracellular calcium mobilization  
318 assay (Figure 2B). Concentration-response profiles for all five tracers were determined  
319 and EC<sub>50</sub> values were calculated. In comparison to the unconjugated peptide analog  
320 CG34 (EC<sub>50</sub> 0.4 nM), the TTDS-linked DOTA conjugate of CG34 had a slightly higher  
321 EC<sub>50</sub> value of 1.51 nM. Receptor affinity was assessed by competitive radioligand binding  
322 studies and resulting IC<sub>50</sub> values were derived (Figure 2C). Furthermore, DOTA  
323 conjugates were labeled with non-radioactive gallium (<sup>nat</sup>Ga) to investigate a potential  
324 impact of metal ion complexation on binding affinity. For DOTA-TTDS-CG34, gallium  
325 labeling barely had an effect on receptor binding (IC<sub>50</sub> value approximately 0.6 nM). As  
326 the unconjugated peptide CG34 exhibited an IC<sub>50</sub> of 1.0 nM, conjugation with DOTA had  
327 even increased its binding affinity. Figure 2D summarizes all EC<sub>50</sub> and IC<sub>50</sub> values of the  
328 five DOTA peptide conjugates. All CG34 conjugates showed EC<sub>50</sub> values within the low  
329 nanomolar range of approx. 0.6 – 1.5 nM, thus, 1.6- to 3.75-fold higher values for receptor  
330 activation than for the unconjugated peptide. However, for receptor binding the IC<sub>50</sub> values  
331 were similar to the value for CG34 or even lower (subnanomolar range: approx.

332 0.3 – 1.0 nM) and cold gallium labeling did not adversely affect the affinity. Compared to  
333 the activating potency ( $EC_{50}$  0.9 nM) and binding affinity ( $IC_{50}$  0.1 nM) of the unconjugated  
334 peptide CG36, the DOTA-AHX-CG36 probe exhibited only slightly higher values ( $EC_{50}$   
335 1.53 nM,  $IC_{50}$  w/o  $^{nat}Ga$  0.13 nM and w/  $^{nat}Ga$  0.13 nM).

336  
337 ***In vivo* PET/MR imaging and biodistribution studies demonstrate specific tracer**  
338 **uptake in CMKLR1-expressing tumors**

339 An initial PET study was performed to estimate the *in vivo* behavior of the five tracer  
340 conjugates after  $^{68}Ga$  labeling. Tumor-bearing mice received an intravenous injection of  
341 approximately 20 MBq radiotracer and were imaged for 30 minutes starting one hour post-  
342 injection in the PET/MRI scanner. Figure 3 shows *in vivo* PET images of the five tracers,  
343 depicted with hydrophobicity increasing from left to right. The most hydrophilic tracer  $^{68}Ga$ -  
344 DOTA-TTDS-CG34 accumulated mainly in the kidneys (Figure 3A, yellow arrow) with no  
345 clear DU4475 tumor uptake (right shoulder) compared to the general background. With  
346  $^{68}Ga$ -DOTA-AHX-CG34, tumor-to-background signal was found to be higher (Figure 3B,  
347 white arrow) and accompanied by less kidney uptake. The tracer uptake within the target-  
348 positive tumor on the right shoulder was even more enhanced with KCap as linker (Figure  
349 3C, white arrow). The most hydrophobic CG34 tracer, with ADX as a linker, also led to  
350 specific tumor uptake (Figure 3D, white arrow), but also high kidney (yellow arrow) and  
351 apparent liver uptake (red arrow). For the tracer  $^{68}Ga$ -DOTA-AHX-CG36, kidney and liver  
352 signals were high but almost no tumor uptake could be detected (Figure 3E). Based on  
353 these initial *in vivo* findings, the three most promising tracers  $^{68}Ga$ -DOTA-AHX-CG34,  
354  $^{68}Ga$ -DOTA-KCap-CG34 and  $^{68}Ga$ -DOTA-ADX-CG34 were further analyzed. In addition  
355 to PET/MRI scans, *ex vivo* biodistribution studies were performed.



356  
357 *In vivo* hybrid imaging with  $^{68}\text{Ga}$ -DOTA-KCap-CG34 and  $^{68}\text{Ga}$ -DOTA-ADX-CG34 using  
358 the PET/MRI scanner enabled not only functional PET analysis of the tracers but also  
359 allowed to gain anatomical insights into the tumor tissue and volume by high-resolution  
360 T2-weighted MR imaging (upper panels, Figure 4). As seen in the T2-weighted images,  
361 both tumors (A549 on the left and DU4475 on the right shoulder) were of comparable size,  
362 tissue characteristics and vascularization. The KCap-linked radiotracer apparently  
363 accumulated in the DU4475 tumor and in kidneys one hour post-injection with decreasing  
364 PET signals after two hours. In contrast, no clear A549 tumor signal could be detected  
365 (upper panel, Figure 4A). In addition to *in vivo* imaging, tumor-bearing mice were injected  
366 with approximately 10 MBq of radiotracer and sacrificed after one and two hours,  
367 respectively. By *ex vivo* measurement, tissue radioactivity was calculated as percentage  
368 of injected activity per gram tissue (% IA/g). After one hour,  $^{68}\text{Ga}$ -DOTA-KCap-CG34 led  
369 to a DU4475 tumor uptake of about 4.5% IA/g and was 2-fold less in the A549 tumor with  
370 approx. 2.3% IA/g. Furthermore, higher values were measured for spleen (approx. 4.9%  
371 IA/g) and, due to the predominant renal excretion of peptides, for kidneys (approx. 5.8%  
372 IA/g). The DU4475 uptake decreased to approx. 2.9% IA/g, whereas the kidney signal  
373 increased up to approx. 6.5% IA/g two hours post-injection (lower panel, Figure 4A). For  
374  $^{68}\text{Ga}$ -DOTA-ADX-CG34, the PET signal in DU4475 tumor and kidneys was comparatively  
375 stronger one and two hours post-injection than the uptake of  $^{68}\text{Ga}$ -DOTA-KCap-CG34 and  
376 there was also an additional distinct liver uptake of the radiotracer (upper panel, Figure  
377 4B). These higher organ uptakes were confirmed by biodistribution data (lower panel,  
378 Figure 4B). In addition to overall higher values one hour after injection, liver (approx.  
379 14.2% IA/g), kidney (10.3% IA/g) and spleen (7.8% IA/g) uptakes were the most profound

380 off-target effects. However, with approx. 6.2% IA/g for CMKLR1-positive DU4475 tumors  
381 and approx. 2.7% IA/g for target-negative A549 tumors, PET results and tracer specificity  
382 could be confirmed. After two hours, DU4475 uptake declined by 1.5-fold to approx. 4.2%  
383 IA/g and a distinct liver uptake (approx. 12.5% IA/g) persisted. Kinetic measurements of  
384 tracer concentration in tumors, kidneys and liver demonstrated a delayed kidney peak for  
385  $^{68}\text{Ga}$ -DOTA-KCap-CG34, the most hydrophobic molecule, with rapid washout from  
386 kidneys for both  $^{68}\text{Ga}$ -DOTA-AHX-CG34 and  $^{68}\text{Ga}$ -DOTA-ADX-CG34 (Figure S2). While  
387 the other two tracers showed a small decline in the DU4475 tumor,  $^{68}\text{Ga}$ -DOTA-ADX-  
388 CG34 appeared to gain in tumor activity until 90 min p.i.

389

### 390 **Receptor blocking studies verify tracer specificity**

391 For further investigation of CMKLR1 specificity of the radiotracers, blocking experiments  
392 were carried out. To examine whether tracer binding to the tissues could be displaced,  
393 PET/MR imaging was performed twice with the same animal, once with and once without  
394 an excess of unlabeled peptide. In parallel, biodistribution experiments under blocking  
395 conditions (excess of unlabeled peptide) were performed to confirm PET results  
396 independently in a quantitative manner.

397

398 Figure 5 shows representative results of *in vivo* receptor blocking experiments with  $^{68}\text{Ga}$ -  
399 DOTA-AHX-CG34. PET/MR imaging without excess of the unconjugated and unlabeled  
400 peptide CG34 showed DU4475 tumor and kidney signals one hour post-injection (Figure  
401 5A). However, co-injection of 200 nmol CG34 (50-fold excess) led to a complete loss of  
402 tumor uptake and a highly enhanced kidney signal (Figure 5B). The tracer biodistribution  
403 one hour after injection without competing CG34 clearly demonstrated the distinct

404 DU4475 tumor uptake (approx. 5.1% IA/g) and the high kidney (approx. 6.5% IA/g) and  
405 spleen (approx. 6.3% IA/g) values (Figure 5C). CMKLR1 blocking with an excess of CG34  
406 led to an overall low tissue and organ radioactivity except for strong kidney uptake (8.6%  
407 IA/g) and excretion into the urinary bladder. The tracer uptake within DU4475 tumors could  
408 be blocked by a factor of 6.4 to approximately 0.8% IA/g (Figure 5D).

409

410 A summary of all biodistribution data including calculated tissue radioactivity ratios for the  
411 three most promising tracers  $^{68}\text{Ga}$ -DOTA-AHX-CG34,  $^{68}\text{Ga}$ -DOTA-KCap-CG34 and  $^{68}\text{Ga}$ -  
412 DOTA-ADX-CG34 is presented in Table 1. Use of these CMKLR1 tracers resulted in  
413 distinct target-specific DU4475 tumor uptake with 5.1% IA/g ( $^{68}\text{Ga}$ -DOTA-AHX-CG34),  
414 4.3% IA/g ( $^{68}\text{Ga}$ -DOTA-KCap-CG34) and 6.2% IA/g ( $^{68}\text{Ga}$ -DOTA-ADX-CG34). All three  
415 of them showed favorable tumor-to-kidneys ratios with 0.9, 0.7 and 0.8. CMKLR1  
416 specificity could be proven by 1.8-fold (5.1 vs. 3.0% IA/g), 1.9-fold (4.3 vs. 2.3% IA/g) and  
417 2.3-fold (6.2 vs. 2.7% IA/g) higher uptake in CMKLR1-positive DU4475 tumors than in  
418 target-negative A549 tumors one hour post-injection. In addition, receptor blocking by co-  
419 injection of an excess of unlabeled chemerin peptide diminished specific tracer binding by  
420 6.4-fold (5.1 vs. 0.8% IA/g), 7.2-fold (4.3 vs. 0.6% IA/g) and 3.4-fold (6.2 vs. 1.8% IA/g).  
421 The most stable and durable tumor uptake was achieved by  $^{68}\text{Ga}$ -DOTA-AHX-CG34 with  
422 4.9% IA/g (approx. 96% of the 1 h-value) after two hours, whereas uptake of the KCap-  
423 linked (approx. 67%) and ADX-linked (approx. 68%) tracers declined faster within two  
424 hours after injection. The highest overall non-tumor uptake values were seen with  $^{68}\text{Ga}$ -  
425 DOTA-ADX-CG34, with considerable liver (14.2% IA/g) and kidney (10.3% IA/g) uptake  
426 and hence, the lowest tissue radioactivity ratios for the DU4475 tumor.

427

## 428 **Discussion and Conclusions**

429

430 The purpose of this study was to evaluate a family of five novel CMKLR1 tracers for their  
431 capacity to generate target-specific signals in a breast cancer xenograft mouse model. To  
432 the best of our knowledge, this is the first report of CMKLR1 *in vivo* imaging. Although  
433 known for its role in inflammation and metabolic regulation for many years, CMKLR1 and  
434 its chemokine-like ligand chemerin were only recently recognized as modulators of tumor  
435 proliferation and expansion. While other labs have reported overexpression and functional  
436 involvement of CMKLR1 in esophageal squamous cell carcinoma, hepatocellular  
437 carcinoma, neuroblastoma and gastric cancer [27-30], we have recently found CMKLR1  
438 overexpression in breast cancer and pancreatic adenocarcinoma and have consequently  
439 developed two peptide analogs of chemerin for use in receptor-mediated tumor targeting  
440 (manuscript in preparation). These peptide analogs were based on chemerin-9, which has  
441 full agonistic activity towards the receptor CMKLR1 and corresponds to the C-terminal  
442 nine amino acids of processed chemerin [32]. In a previous study, we have shown the  
443 potential to generate stable and potent chemerin-9 analogs by the introduction of D-amino  
444 acids via an evolutionary algorithm [33]. The resulting peptide analogs showed improved  
445 properties concerning receptor activation, binding affinity and metabolic stability. In this  
446 study, we have made use of such analogs as components of chelator conjugates to do  
447 PET/MR imaging in a breast cancer xenograft mouse model.

448 The suitability of the animal model with CMKLR1-positive DU4475 and CMKLR1-negative  
449 A549 xenograft tumors was confirmed by immunofluorescence staining and radioligand  
450 binding studies. As expression of proteins in cells may change upon transfer from the

451 culture dish monolayer to three-dimensional subcutaneous xenograft tumor tissue in mice,  
452 we investigated CMKLR1 expression in tumor tissue. Thereby, overexpression as well as  
453 ligand binding were established for DU4475 tumors while A549 tumors were confirmed as  
454 a negative control. The moderate tracer uptake seen in the latter is probably due to  
455 unspecific mechanisms, such as the enhanced retention and permeability effect or blood  
456 pool activity.

457 In the design of our tracers, we followed the hypothesis that tumor uptake and  
458 biodistribution may depend on a balance of hydrophobic and hydrophilic properties within  
459 the molecule. Therefore, we chose not only to make use of a more hydrophilic and a more  
460 hydrophobic CMKLR1 peptide ligand analog, but also to take advantage of different  
461 linkers to introduce a varying degree of hydrophobicity into the conjugates. As DOTA with  
462 its four carboxylic groups confers rather strong hydrophilic features, we chose to  
463 compensate this with mainly hydrophobic linker moieties: 6-aminohexanoic acid (AHX),  
464 N- $\epsilon$ -capryloyl-lysine (KCap) and 10-aminodecanoic acid (ADX). Only one linker displayed  
465 hydrophilic properties: the PEG-like 4,7,10-trioxatridecan-succinamic acid (TTDS)  
466 (Figure 2A). A set of five resulting DOTA peptide conjugates was tested *in vitro* prior to  
467 the animal study. Of note, all these tracers proved to be of high affinity and functional  
468 activity, with IC<sub>50</sub> and EC<sub>50</sub> values being below 2 nM (Figure 2D). Affinity also did not  
469 change significantly upon complexation of DOTA with non-radioactive gallium, and if so,  
470 IC<sub>50</sub> values even decreased. This was in many ways unexpected as we and others had  
471 often experienced an impairment of the binding and activating capacity of ligands upon  
472 conjugation with a linker and a reporter such as a chelator or dye molecule [34-37].  
473 Likewise, the affinity of such a conjugate may be affected by the coordination of a

474 radiometal ion [38]. The structural requirements of chemerin analogs binding to CMKLR1  
475 obviously allow for a broad variety of additions to the N-terminus of the nonameric peptide.  
476 Even though the two most potent conjugates were the ones with the shortest linkers (AHX  
477 and ADX), differences were small and a significant systematic influence of linker  
478 hydrophobicity or length on affinity or activity was not observed.

479 The initial PET studies using all five tracers revealed a clear difference regarding tumor  
480 uptake and biodistribution: the most hydrophilic conjugate ( $^{68}\text{Ga}$ -DOTA-TTDS-CG34) and  
481 the most hydrophobic conjugate ( $^{68}\text{Ga}$ -DOTA-AHX-CG36) both showed lower tumor  
482 uptake and higher kidney uptake than the three conjugates with balanced hydrophilicity in  
483 the molecule (Figure 3). This was also confirmed by results from biodistribution  
484 experiments: for both tracers, there was no clear difference in uptake between target-  
485 positive and target-negative tumor (Figure S1 and Table S1). These results may indicate  
486 the validity of our hypothesis that sufficient and specific tumor uptake may be achieved  
487 best using a conjugate with moderate, balanced hydrophilicity. Both highly hydrophobic  
488 and strongly hydrophilic tracers may primarily yield unspecific uptake in kidney and liver.

489 By peptide optimization and conjugation, we were able to obtain a family of five high-  
490 potency, high-affinity molecular probes for further *in vivo* application as radioactive  
491 tracers. In addition to PET/MRI scans one and two hours post-injection, *ex vivo*  
492 biodistribution studies were performed to assess quantitative values for tissue uptake.  
493 Utilizing a breast-cancer xenograft mouse model, PET/MRI and concomitant  
494 biodistribution studies revealed the specificity of our chemerin-based radiotracers by  
495 distinct PET signals and uptake values of CMKLR1-positive DU4475 tumors compared to  
496 no PET visibility and low tumor radioactivity values of target-negative A549 tumors.

497 Kidney uptake often limits therapeutic use of tracers. For the three best tracers described  
498 in this study, renal uptake was between 5.8 to 10.3% IA/g, resulting in favorable tumor-to-  
499 kidney ratios of 0.7 to 0.9 at one hour post injection. Further evidence for the specificity of  
500 the tracer was obtained in a blocking experiment with an excess of non-labeled peptide  
501 (Figure 5). As obvious from both PET/MR images as well as biodistribution data, this  
502 excess strongly reduced uptake of the tracer  $^{68}\text{Ga}$ -DOTA-AHX-CG34 in CMKLR1-positive  
503 DU4475 tumors, indicating displacement of the radioligand from its receptor. The lower  
504 uptake observed in other organs probably also corresponds to tracer displacement from  
505 chemerin receptors known to be expressed there (e.g. lung, spleen) [21, 39]. The dynamic  
506 PET scan of  $^{68}\text{Ga}$ -DOTA-AHX-CG34 showed faster background/off-target clearance as  
507 well as fast and stable accumulation at tumor sites. Whereas higher hydrophobicity of  
508 KCap and ADX led to delayed and prolonged kidney uptake, possibly due to plasma  
509 protein binding or metabolization in the liver (Figure S2).

510 While a tumor uptake of 4-6% represents a promising targeting result for these first  
511 CMKLR1 tracers, several options for an improvement remain. One current limitation,  
512 especially for an application in peptide receptor radionuclide therapy (PRRT), is the fast  
513 elimination of the signal from the target-positive tumor. According to biodistribution data,  
514 the signal decrease between one hour and two hours in DU4475 tumors was about 25-  
515 70%. Although the underlying peptide analogs have been selected for their improved  
516 stability in *in vitro* protease degradation assays, a degradation due to proteolytic activity  
517 in circulation and target tissue may play a role. Similarly, fast excretion via the renal  
518 pathway, as well as hepatic degradation (e.g.  $^{68}\text{Ga}$ -DOTA-ADX-CG34) may create  
519 unfavorable distribution kinetics. The precise causes for this rapid decrease in tumor



520 signal will have to be determined in subsequent studies. Biochemical isolation and  
521 analysis of tracer metabolites from the animal's circulation may provide a means of  
522 clarifying the underlying mechanism.

523 **Abbreviations**

524 % IA/g: percent injected activity per gram tissue; <sup>18</sup>F-FDG: <sup>18</sup>F-fluoro-deoxyglucose; ADX:  
525 10-aminodecanoic acid; AHX: 6-aminohexanoic acid; BERIC: Berlin Experimental  
526 Radionuclide Imaging Center; BSA: bovine serum albumin; CG34: chemerin analog with  
527 amino acid sequence Y-Cha-Hyp-G-Cit-F-a-Tic-S; CG36: chemerin analog with amino  
528 acid sequence Y-Cha-P-G-M-Y-A-F-f; Chem9: chemerin-9; CMKLR1: chemokine-like  
529 receptor 1; DMSO: dimethyl sulfoxide; DOTA: 1,4,7,10-tetraazacyclododecane-1,4,7,10-  
530 tetraacetic acid; DTPA: diethylenetriaminepentaacetic acid; EC<sub>50</sub>: half maximal effective  
531 concentration; ECM: extracellular matrix; EGFR: epithelial growth factor receptor; EGTA:  
532 ethylene glycol-bis(β-aminoethyl ether)-N,N,N',N'-tetraacetic acid; ESCC: esophageal  
533 squamous cell carcinoma; G418: geneticin; GMP: good manufacturing practice; GPCR:  
534 G protein-coupled receptor; HEPES: 4-(2-hydroxyethyl)-1-piperazineethanesulfonic acid;  
535 HPLC: high-performance liquid chromatography; IC<sub>50</sub>: half maximal inhibitory  
536 concentration; KCap: N-ε-capryloyl-lysine; MRI: magnetic resonance imaging; NET:  
537 neuroendocrine tumor; NMRI: Naval Medical Research Institute; PBS: phosphate-  
538 buffered saline; PEG: polyethylene glycol; PET: positron emission tomography; PRRT:  
539 peptide receptor radionuclide therapy; PSMA: prostate-specific membrane antigen;  
540 RPMI1640: Roswell Park Memorial Institute medium 1640; SD: standard deviation; SEM:  
541 standard error of the mean; SSA: somatostatin analog; SSTR: somatostatin receptor; T2  
542 FSE 2D: high-resolution T2-weighted 2D fast spin echo sequence; TBS: tris-buffered  
543 saline; TE: echo time; TFA: trifluoroacetic acid; TR: repetition time; TTDS: 4,7,10-  
544 trioxatridecan-succinamic acid; VOI: volume of interest

545

546 **Author Contributions**

547 Conception and design: S.E., C.G. Development of methodology: S.E., C.G. Acquisition  
548 of data: S.E., L.N., E.J.K., J.D.C.G., S.P., A.W., J.L.v.H., S.H., S.E., S.B. Analysis and  
549 interpretation of data: S.E., C.G. Writing, review, and/or revision of the manuscript: S.E.,  
550 E.J.K., N.B., W.B., C.G. Study supervision: W.Br., C.G.

551

552 **Competing interests**

553 The authors have declared that no competing interests exist.

554 **Figure Legends**

555

556 **Figure 1: Characterization of the xenograft tumor model.** Breast cancer DU4475 and  
557 lung cancer A549 cells were employed to establish a xenograft model with both CMKLR1-  
558 positive and -negative tumor. **(A)** Immunostaining of xenograft cryosections revealed  
559 CMKLR1 immunostaining (green) in DU4475 *ex vivo* tissue whereas the A549 tumor  
560 showed no signal. (blue: cell nuclei; bar = 50  $\mu$ m) **(B)** Competitive radioligand binding  
561 studies with  $^{125}$ I-labeled chemerin-9 showed specific binding to DU4475 cell membranes  
562 (*in vitro*) and xenograft tumor membranes (*ex vivo*), which could be blocked by 1  $\mu$ M  
563 unlabeled ligand (Chem9). In contrast, A549 cells showed no and A549 xenografts only  
564 minor binding. Data were obtained from at least three independent experiments and  
565 values are indicated as means  $\pm$  SEM. (\*\*\*\* P < 0.0001)

566

567 **Figure 2: Characterization of DOTA peptide conjugates regarding their functionality**  
568 **and affinity.** **(A)** The chelating agent 1,4,7,10-tetraazacyclododecane-1,4,7,10-  
569 tetraacetic acid (DOTA) was conjugated to the N-terminus of one of the two optimized  
570 chemerin peptide analogs, CG34 and CG36, by one of the four chemical linkers. **(B)** By  
571 functional  $\text{Ca}^{2+}$  mobilization assay, the concentration-response curve for the TTDS-linked  
572 CG34 conjugate could be determined and the resulting  $\text{EC}_{50}$  value (1.51 nM) confirmed  
573 its high receptor-activating potency. Response data are presented as mean  $\pm$  SEM of  
574 three independent experiments. **(C)** Ligand affinity to the receptor was assessed by  
575 competitive radioligand binding experiments using  $^{125}$ I-chemerin-9 as radioligand.  
576 Displacement binding curves revealed similar  $\text{IC}_{50}$  values of the labeled (with  $^{\text{nat}}\text{Ga}$ ) and  
577 unlabeled (without  $^{\text{nat}}\text{Ga}$ ) DOTA conjugate indicating high affinity. Data are shown as

578 mean  $\pm$  SEM of three independent experiments normalized to non-competed radioligand  
579 binding. **(D)** To assess how the conjugation affects the ligand characteristics, functional  
580 and affinity data were obtained accordingly for all five chemerin conjugates (summarized  
581 as EC<sub>50</sub>/IC<sub>50</sub> values). The Ca<sup>2+</sup> and binding assays were performed with HEK293a cells  
582 stably expressing huCMKLR1 and G<sub>α16</sub>. All EC<sub>50</sub>/IC<sub>50</sub> values were obtained from three  
583 independent experiments and are indicated as means  $\pm$  SD. (green colors indicate more  
584 hydrophilic, red more hydrophobic properties of peptides and linker)

585  
586 **Figure 3: Comparison of tracer biodistribution by PET imaging.** Representative static  
587 PET images were acquired for 30 minutes one hour post-injection of the five <sup>68</sup>Ga-labeled  
588 DOTA conjugates in a DU4475/A549 tumor model and revealed a differential distribution.  
589 Approximately 20 MBq of each tracer were injected intravenously. **(A)** Predominant renal  
590 excretion of the hydrophilic tracer <sup>68</sup>Ga-DOTA-TTDS-CG34 is indicated by a pronounced  
591 kidney signal (yellow arrow). **(B-C)** The more hydrophobic linkers AHX and KCap led to  
592 less kidney signal, but more distinct DU4475 uptake (white arrows). **(D)** Beside the kidney  
593 uptake, <sup>68</sup>Ga-DOTA-ADX-CG34 induced an increased liver signal (red arrow). **(E)** <sup>68</sup>Ga-  
594 DOTA-AHX-CG36 showed a comparable kidney and liver uptake, but less accumulation  
595 in the DU4475 tumor.

596  
597 **Figure 4: PET/MR imaging and biodistribution study with CMKLR1-targeted,**  
598 **chemerin-based tracers <sup>68</sup>Ga-DOTA-KCap-CG34 and <sup>68</sup>Ga-DOTA-ADX-CG34.**  
599 Representative static PET images were acquired for 30 minutes one and two hours post-  
600 injection (p.i.) of 20 MBq <sup>68</sup>Ga-labeled conjugate in DU4475 (target-positive) and A549  
601 (negative) tumor model (upper panel). For quantitative analysis of tracer biodistribution,

602 10 MBq of the tracer was injected intravenously and tissue was analyzed *ex vivo* one or  
603 two hours p.i. Values for tracer uptake are indicated as percent injected activity per gram  
604 tissue (% IA/g) (lower panel). **(A)** The T2-weighted MRI image clearly shows both tumors  
605 on the animal's shoulders. The PET images reveal  $^{68}\text{Ga}$ -DOTA-KCap-CG34 uptake in  
606 DU4475 after one hour, which decreased two hours p.i. The A549 tumor accumulated  
607 much less activity. Beside tumor uptake, the tracer accumulated in the kidneys after one  
608 hour. The quantitative analysis of biodistribution indicates the clear tracer uptake in  
609 DU4475 as compared to A549. Predominant renal excretion is represented by a  
610 noticeable kidney value ( $3 \leq n \leq 15$ ; mean  $\pm$  SEM). **(B)** Injection of  $^{68}\text{Ga}$ -DOTA-ADX-  
611 CG34 resulted in a strong DU4475 and low A549 uptake. In addition, tracer uptake was  
612 detected in kidneys and liver. Quantitative analysis of tracer biodistribution after one hour  
613 shows a high uptake in DU4475, and less in A549 tumors. Furthermore, the more  
614 hydrophobic tracer accumulated in the kidneys, liver and spleen and led to an overall  
615 stronger and longer organ accumulation ( $5 \leq n \leq 16$ ; mean  $\pm$  SEM).

616  
617 **Figure 5: PET/MR imaging and biodistribution study along with a blocking**  
618 **experiment.** Representative static PET images were acquired for 30 minutes one and  
619 two hours p.i. of  $^{68}\text{Ga}$ -labeled DOTA-AHX-CG34 conjugate **(A)** without and **(B)** with  
620 coinjected 50-fold excess of unlabeled peptide CG34 (200 nmol) in the same animal.  
621 20 MBq of the tracer were injected intravenously. PET images show a strong DU4475  
622 uptake, which could be completely displaced with excess of non-labeled peptide.  
623 Quantitative analysis of tracer biodistribution (10 MBq) one hour p.i. **(C)** without and **(D)**  
624 with receptor blocking confirmed mainly the specific tracer uptake in the DU4475 tumor.  
625 ( $6 \leq n \leq 13$ ; mean  $\pm$  SEM)

626 **Tables**

627

628 **Table 1: Biodistribution data and tissue radioactivity ratios of <sup>68</sup>Ga-labeled**

629 **chemerin tracers in the DU4475/A549 xenograft model.** Data are presented as

630 mean ± SEM (2 ≤ n ≤ 16) % IA/g of tissue or as a ratio. Blocking studies were performed

631 in the presence of 200 nmol of CG34.

632

| Organ             | <sup>68</sup> Ga-DOTA-AHX-CG34 |             |            | <sup>68</sup> Ga-DOTA-KCap-CG34 |             |            | <sup>68</sup> Ga-DOTA-ADX-CG34 |             |            |
|-------------------|--------------------------------|-------------|------------|---------------------------------|-------------|------------|--------------------------------|-------------|------------|
|                   | 1 h                            | 1 h-blocked | 2 h        | 1 h                             | 1 h-blocked | 2 h        | 1 h                            | 1 h-blocked | 2 h        |
| DU4475            | 5.1 ± 0.5                      | 0.8 ± 0.1   | 4.9 ± 0.8  | 4.3 ± 1.0                       | 0.6 ± 0.1   | 2.9 ± 0.5  | 6.2 ± 0.5                      | 1.8 ± 0.1   | 4.2 ± 1.0  |
| A549              | 3.0 ± 0.3                      | 1.1 ± 0.2   | 1.4 ± 0.1  | 2.3 ± 0.4                       | 0.6 ± 0.1   | n.d.       | 2.7 ± 0.4                      | 1.6 ± 0.2   | 4.5        |
| small intestine   | 2.1 ± 0.2                      | 0.4 ± 0.0   | 2.0 ± 0.4  | 2.3 ± 0.1                       | 0.3 ± 0.1   | 1.9 ± 0.3  | 3.8 ± 0.2                      | 1.4 ± 0.2   | 4.4 ± 2.0  |
| colon             | 2.7 ± 0.3                      | 0.5 ± 0.0   | 2.6 ± 0.7  | 2.4 ± 0.2                       | 0.3 ± 0.0   | 1.7 ± 0.2  | 3.2 ± 0.3                      | 1.2 ± 0.1   | 2.3 ± 0.3  |
| liver             | 2.4 ± 0.3                      | 0.6 ± 0.0   | 2.4 ± 0.4  | 2.2 ± 0.1                       | 0.3 ± 0.0   | 1.8 ± 0.2  | 14.2 ± 1.1                     | 10.4 ± 0.9  | 12.5 ± 1.1 |
| spleen            | 6.3 ± 0.8                      | 0.8 ± 0.1   | 5.0 ± 0.5  | 4.9 ± 0.5                       | 0.5 ± 0.1   | 4.0 ± 0.6  | 7.8 ± 0.6                      | 2.3 ± 0.4   | 5.4 ± 1.0  |
| kidney            | 6.5 ± 0.9                      | 8.6 ± 1.4   | 6.6 ± 1.1  | 5.8 ± 0.9                       | 5.2 ± 0.9   | 6.5 ± 1.3  | 10.3 ± 1.7                     | 14.5 ± 3.9  | 5.5 ± 1.6  |
| heart             | 1.2 ± 0.1                      | 0.4 ± 0.0   | 1.1 ± 0.3  | 1.1 ± 0.1                       | 0.2 ± 0.0   | 0.8 ± 0.1  | 2.2 ± 0.2                      | 1.4 ± 0.1   | 1.2 ± 0.1  |
| blood             | 1.2 ± 0.4                      | 0.8 ± 0.1   | 0.4 ± 0.1  | 0.6 ± 0.1                       | 0.5 ± 0.1   | 0.2 ± 0.0  | 2.8 ± 0.7                      | 3.2 ± 0.3   | 0.8 ± 0.1  |
| lung              | 4.2 ± 0.5                      | 1.0 ± 0.1   | 2.8 ± 0.3  | 1.7 ± 0.1                       | 0.5 ± 0.1   | 1.2 ± 0.1  | 7.1 ± 0.7                      | 3.4 ± 0.2   | 3.9 ± 0.4  |
| muscle            | 0.7 ± 0.1                      | 0.2 ± 0.0   | 0.5 ± 0.1  | 0.6 ± 0.1                       | 0.2 ± 0.1   | 0.4 ± 0.1  | 1.1 ± 0.1                      | 0.6 ± 0.1   | 0.6 ± 0.1  |
| femur             | 0.8 ± 0.1                      | 0.2 ± 0.0   | 0.7 ± 0.1  | 0.6 ± 0.1                       | 0.2 ± 0.1   | 0.5 ± 0.1  | 1.3 ± 0.2                      | 0.7 ± 0.1   | 0.7 ± 0.1  |
| stomach           | 1.7 ± 0.2                      | 0.4 ± 0.0   | 1.3 ± 0.1  | 1.4 ± 0.1                       | 0.3 ± 0.1   | 1.1 ± 0.2  | 2.2 ± 0.2                      | 1.1 ± 0.1   | 1.5 ± 0.2  |
| pancreas          | 1.0 ± 0.1                      | 0.3 ± 0.0   | 0.8 ± 0.1  | 0.9 ± 0.1                       | 0.2 ± 0.0   | 0.7 ± 0.1  | 1.7 ± 0.2                      | 0.8 ± 0.1   | 1.1 ± 0.1  |
| tumor-to-blood    | 5.9 ± 0.7                      | 1.0 ± 0.1   | 13.3 ± 3.0 | 7.3 ± 1.6                       | 1.3 ± 0.3   | 18.2 ± 3.4 | 3.0 ± 0.3                      | 0.6 ± 0.1   | 5.7 ± 1.1  |
| tumor-to-liver    | 2.3 ± 0.2                      | 1.2 ± 0.0   | 2.2 ± 0.5  | 2.1 ± 0.5                       | 1.8 ± 0.3   | 1.8 ± 0.4  | 0.4 ± 0.0                      | 0.2 ± 0.0   | 0.3 ± 0.1  |
| tumor-to-kidney   | 0.9 ± 0.1                      | 0.1 ± 0.0   | 0.7 ± 0.1  | 0.7 ± 0.1                       | 0.1 ± 0.0   | 0.6 ± 0.1  | 0.8 ± 0.1                      | 0.2 ± 0.0   | 0.8 ± 0.2  |
| tumor-to-pancreas | 5.6 ± 0.7                      | 2.9 ± 0.2   | 6.2 ± 1.3  | 4.9 ± 1.2                       | 3.7 ± 0.5   | 4.3 ± 0.9  | 3.9 ± 0.3                      | 2.3 ± 0.2   | 3.9 ± 0.7  |
| tumor-to-muscle   | 8.5 ± 1.0                      | 4.4 ± 0.3   | 11.4 ± 2.4 | 8.9 ± 2.3                       | 4.3 ± 0.9   | 7.2 ± 1.2  | 6.3 ± 0.5                      | 3.3 ± 0.3   | 7.2 ± 1.2  |



## 635 References

- 636 1. Sai KKS, Zachar Z, Bingham PM, Mintz A. Metabolic PET Imaging in Oncology. *AJR Am J*  
637 *Roentgenol.* 2017; 209: 270-6.
- 638 2. !!! INVALID CITATION !!! [2-4].
- 639 3. Turker NS, Heidari P, Kucherlapati R, Kucherlapati M, Mahmood U. An EGFR targeted PET  
640 imaging probe for the detection of colonic adenocarcinomas in the setting of colitis. *Theranostics.* 2014;  
641 4: 893-903.
- 642 4. Lutje S, Heskamp S, Cornelissen AS, Poeppel TD, van den Broek SA, Rosenbaum-Krumme S, et al.  
643 PSMA Ligands for Radionuclide Imaging and Therapy of Prostate Cancer: Clinical Status. *Theranostics.*  
644 2015; 5: 1388-401.
- 645 5. Niu G, Chen X. Why integrin as a primary target for imaging and therapy. *Theranostics.* 2011; 1:  
646 30-47.
- 647 6. Nieto Gutierrez A, McDonald PH. GPCRs: Emerging anti-cancer drug targets. *Cell Signal.* 2018; 41:  
648 65-74.
- 649 7. Insel PA, Sriram K, Wiley SZ, Wilderman A, Katakia T, McCann T, et al. GPCRomics: GPCR  
650 Expression in Cancer Cells and Tumors Identifies New, Potential Biomarkers and Therapeutic Targets.  
651 *Front Pharmacol.* 2018; 9: 431.
- 652 8. Chames P, Van Regenmortel M, Weiss E, Baty D. Therapeutic antibodies: successes, limitations  
653 and hopes for the future. *Br J Pharmacol.* 2009; 157: 220-33.
- 654 9. Fani M, Maecke HR, Okarvi SM. Radiolabeled peptides: valuable tools for the detection and  
655 treatment of cancer. *Theranostics.* 2012; 2: 481-501.
- 656 10. Kamath AV. Translational pharmacokinetics and pharmacodynamics of monoclonal antibodies.  
657 *Drug Discov Today Technol.* 2016; 21-22: 75-83.
- 658 11. Zhao N, Qin Y, Liu H, Cheng Z. Tumor-Targeting Peptides: Ligands for Molecular Imaging and  
659 Therapy. *Anticancer Agents Med Chem.* 2018; 18: 74-86.
- 660 12. Kubota A, Yamada Y, Kagimoto S, Shimatsu A, Imamura M, Tsuda K, et al. Identification of  
661 somatostatin receptor subtypes and an implication for the efficacy of somatostatin analogue SMS 201-  
662 995 in treatment of human endocrine tumors. *J Clin Invest.* 1994; 93: 1321-5.
- 663 13. Hoyer D, Bell GI, Berelowitz M, Epelbaum J, Feniuk W, Humphrey PP, et al. Classification and  
664 nomenclature of somatostatin receptors. *Trends Pharmacol Sci.* 1995; 16: 86-8.
- 665 14. Reubi JC. Somatostatin and other Peptide receptors as tools for tumor diagnosis and treatment.  
666 *Neuroendocrinology.* 2004; 80 Suppl 1: 51-6.
- 667 15. Binderup T, Knigge U, Mellon Mogensen A, Palnaes Hansen C, Kjaer A. Quantitative gene  
668 expression of somatostatin receptors and noradrenaline transporter underlying scintigraphic results in  
669 patients with neuroendocrine tumors. *Neuroendocrinology.* 2008; 87: 223-32.
- 670 16. Shi W, Johnston CF, Buchanan KD, Ferguson WR, Laird JD, Crothers JG, et al. Localization of  
671 neuroendocrine tumours with [111In] DTPA-octreotide scintigraphy (Octreoscan): a comparative study  
672 with CT and MR imaging. *QJM.* 1998; 91: 295-301.
- 673 17. Nauck C, Ivancevic V, Emrich D, Creutzfeldt W. 111In-pentetreotide (somatostatin analogue)  
674 scintigraphy as an imaging procedure for endocrine gastro-entero-pancreatic tumors. *Z Gastroenterol.*  
675 1994; 32: 323-7.
- 676 18. Johnbeck CB, Knigge U, Kjaer A. PET tracers for somatostatin receptor imaging of neuroendocrine  
677 tumors: current status and review of the literature. *Future Oncol.* 2014; 10: 2259-77.
- 678 19. Gabriel M, Decristoforo C, Kendler D, Dobrozemsky G, Heute D, Uprimny C, et al. 68Ga-DOTA-  
679 Tyr3-octreotide PET in neuroendocrine tumors: comparison with somatostatin receptor scintigraphy and  
680 CT. *J Nucl Med.* 2007; 48: 508-18.

- 681 20. Kwekkeboom DJ, Bakker WH, Kooij PP, Konijnenberg MW, Srinivasan A, Erion JL, et al. [177Lu-  
682 DOTAOTyr3]octreotate: comparison with [111In-DTPA]octreotide in patients. *Eur J Nucl Med.* 2001; 28:  
683 1319-25.
- 684 21. Yoshimura T, Oppenheim JJ. Chemokine-like receptor 1 (CMKLR1) and chemokine (C-C motif)  
685 receptor-like 2 (CCRL2); two multifunctional receptors with unusual properties. *Exp Cell Res.* 2011; 317:  
686 674-84.
- 687 22. Ernst MC, Haidl ID, Zuniga LA, Dranse HJ, Rourke JL, Zabel BA, et al. Disruption of the chemokine-  
688 like receptor-1 (CMKLR1) gene is associated with reduced adiposity and glucose intolerance.  
689 *Endocrinology.* 2012; 153: 672-82.
- 690 23. Mattern A, Zellmann T, Beck-Sickingler AG. Processing, signaling, and physiological function of  
691 chemerin. *IUBMB Life.* 2014; 66: 19-26.
- 692 24. Ferland DJ, Watts SW. Chemerin: A comprehensive review elucidating the need for  
693 cardiovascular research. *Pharmacol Res.* 2015; 99: 351-61.
- 694 25. Pachynski RK, Zabel BA, Kohrt HE, Tejada NM, Monnier J, Swanson CD, et al. The  
695 chemoattractant chemerin suppresses melanoma by recruiting natural killer cell antitumor defenses. *J*  
696 *Exp Med.* 2012; 209: 1427-35.
- 697 26. Parolini S, Santoro A, Marcenaro E, Luini W, Massardi L, Facchetti F, et al. The role of chemerin in  
698 the colocalization of NK and dendritic cell subsets into inflamed tissues. *Blood.* 2007; 109: 3625-32.
- 699 27. Kumar JD, Kandola S, Tizslavicz L, Reisz Z, Dockray GJ, Varro A. The role of chemerin and  
700 ChemR23 in stimulating the invasion of squamous oesophageal cancer cells. *Br J Cancer.* 2016; 114:  
701 1152-9.
- 702 28. Tummler C, Snapkov I, Wickstrom M, Moens U, Ljungblad L, Maria Elfman LH, et al. Inhibition of  
703 chemerin/CMKLR1 axis in neuroblastoma cells reduces clonogenicity and cell viability in vitro and impairs  
704 tumor growth in vivo. *Oncotarget.* 2017; 8: 95135-51.
- 705 29. Li JJ, Yin HK, Guan DX, Zhao JS, Feng YX, Deng YZ, et al. Chemerin suppresses hepatocellular  
706 carcinoma metastasis through CMKLR1-PTEN-Akt axis. *Br J Cancer.* 2018; 118: 1337-48.
- 707 30. Kumar JD, Aolymat I, Tizslavicz L, Reisz Z, Garalla HM, Beynon R, et al. Chemerin acts via CMKLR1  
708 and GPR1 to stimulate migration and invasion of gastric cancer cells: putative role of decreased TIMP-1  
709 and TIMP-2. *Oncotarget.* 2019; 10: 98-112.
- 710 31. Greenwood FC, Hunter WM, Glover JS. The Preparation of I-131-Labelled Human Growth  
711 Hormone of High Specific Radioactivity. *Biochem J.* 1963; 89: 114-23.
- 712 32. Wittamer V, Gregoire F, Robberecht P, Vassart G, Communi D, Parmentier M. The C-terminal  
713 nonapeptide of mature chemerin activates the chemerin receptor with low nanomolar potency. *J Biol*  
714 *Chem.* 2004; 279: 9956-62.
- 715 33. Bandholtz S, Wichard J, Kuhne R, Grotzinger C. Molecular evolution of a peptide GPCR ligand  
716 driven by artificial neural networks. *PLoS One.* 2012; 7: e36948.
- 717 34. Fani M, Del Pozzo L, Abiraj K, Mansi R, Tamma ML, Cescato R, et al. PET of somatostatin receptor-  
718 positive tumors using 64Cu- and 68Ga-somatostatin antagonists: the chelate makes the difference. *J Nucl*  
719 *Med.* 2011; 52: 1110-8.
- 720 35. Zhang X, Wang B, Zhao N, Tian Z, Dai Y, Nie Y, et al. Improved Tumor Targeting and Longer  
721 Retention Time of NIR Fluorescent Probes Using Bioorthogonal Chemistry. *Theranostics.* 2017; 7: 3794-  
722 802.
- 723 36. Chen Y, Pullambhatla M, Banerjee SR, Byun Y, Stathis M, Rojas C, et al. Synthesis and biological  
724 evaluation of low molecular weight fluorescent imaging agents for the prostate-specific membrane  
725 antigen. *Bioconjug Chem.* 2012; 23: 2377-85.
- 726 37. Mankoff DA, Link JM, Linden HM, Sundararajan L, Krohn KA. Tumor receptor imaging. *J Nucl*  
727 *Med.* 2008; 49 Suppl 2: 149S-63S.
- 728 38. Ginj M, Maecke HR. Radiometallo-labeled peptides in tumor diagnosis and therapy. *Met Ions Biol*  
729 *Syst.* 2004; 42: 109-42.

730 39. Kennedy AJ, Davenport AP. International Union of Basic and Clinical Pharmacology CIII: Chemerin  
731 Receptors CMKLR1 (Chemerin1) and GPR1 (Chemerin2) Nomenclature, Pharmacology, and Function.  
732 Pharmacol Rev. 2018; 70: 174-96.

733

734

Figure 1

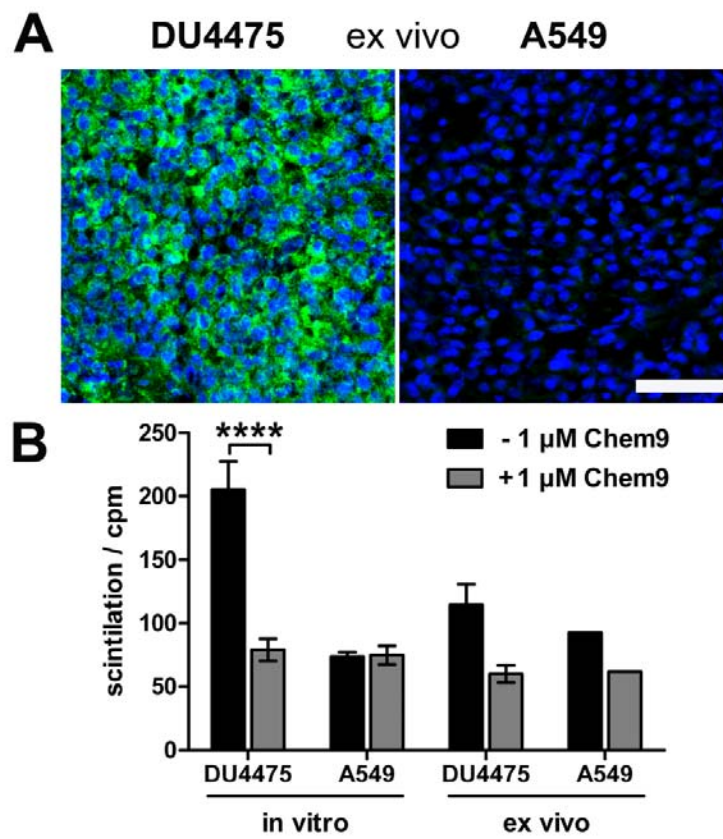

Figure 2

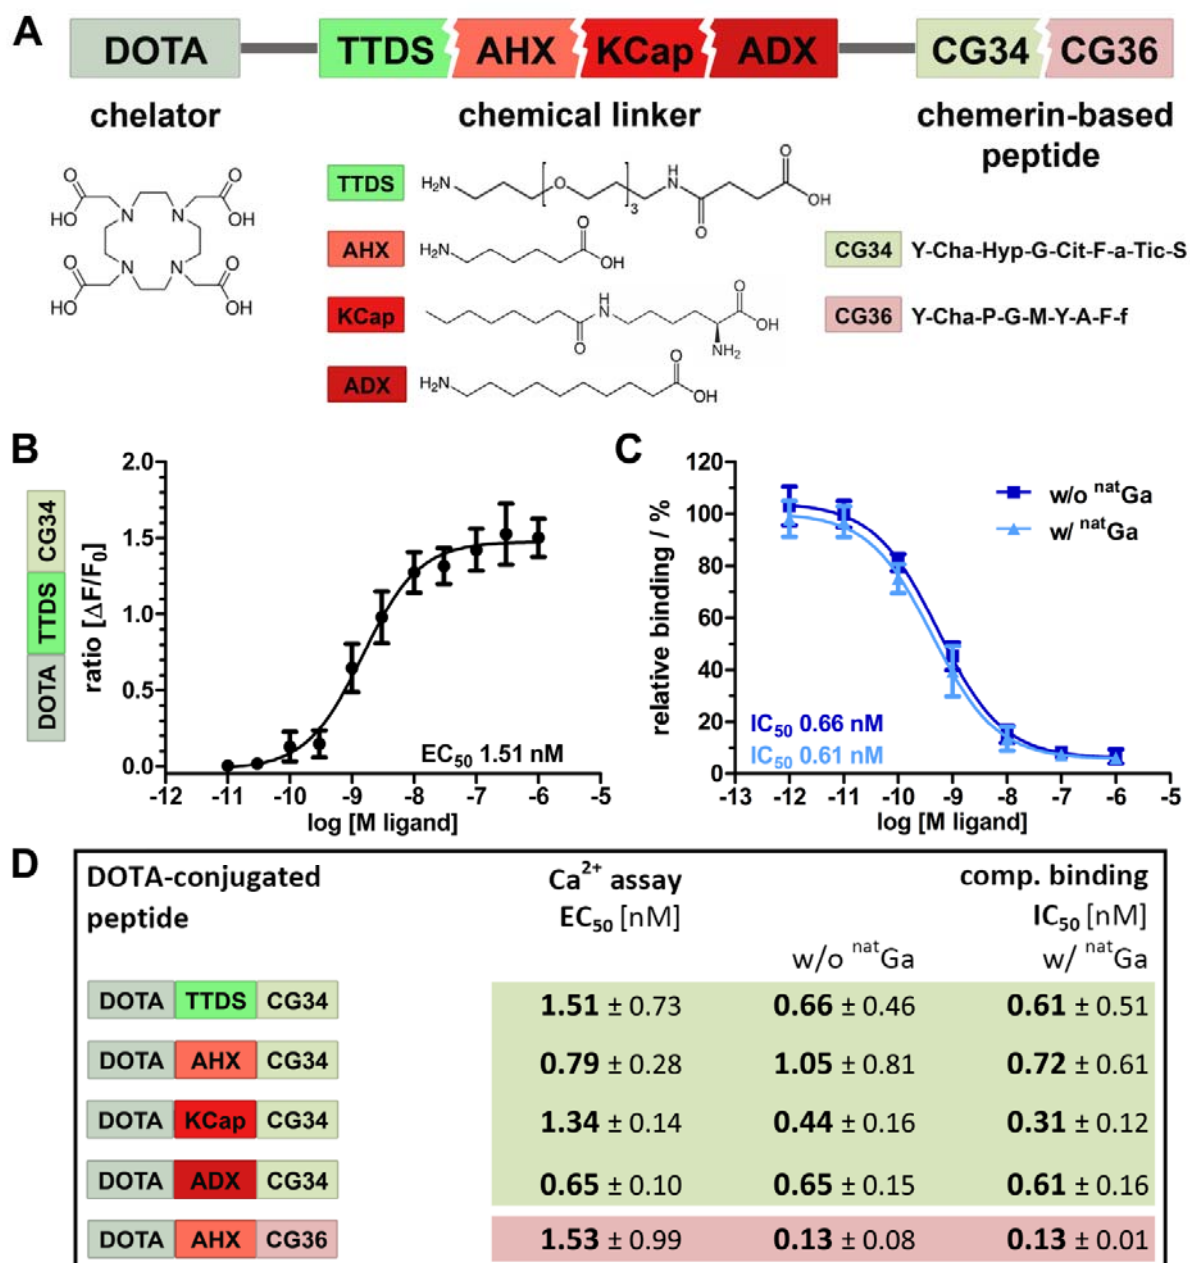

**Figure 3**

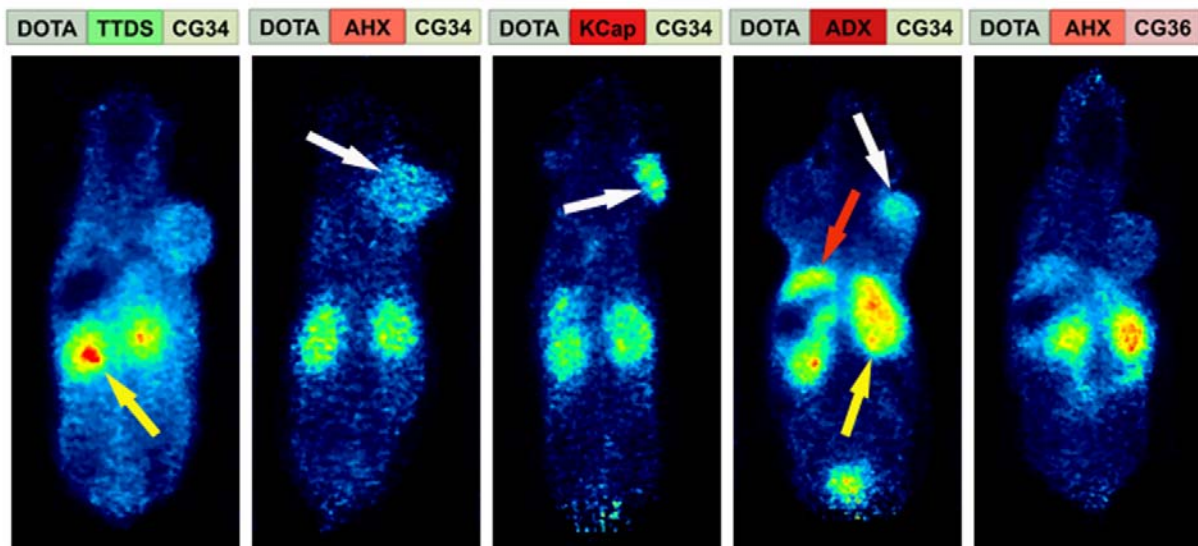

Figure 4

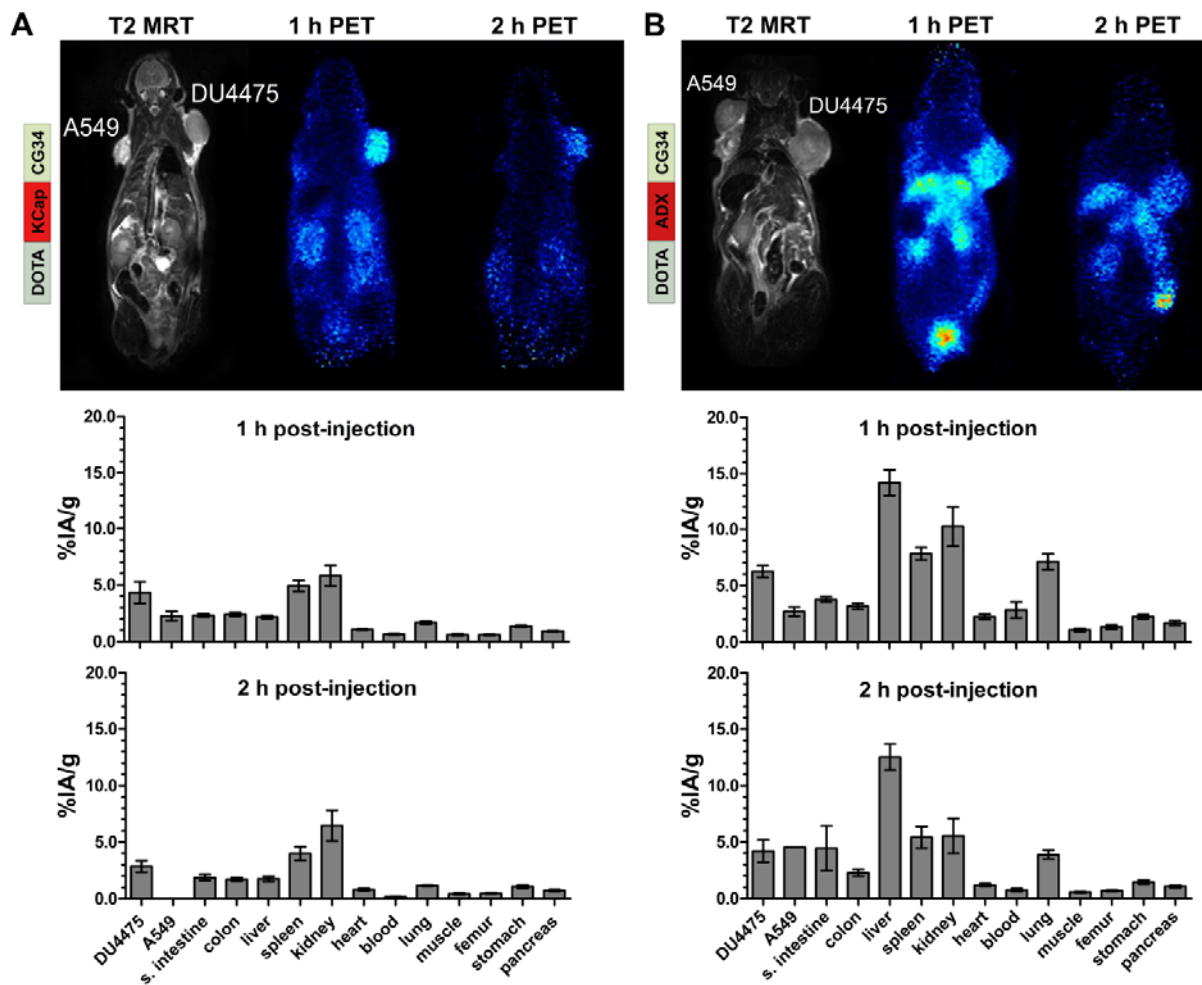



Figure 5

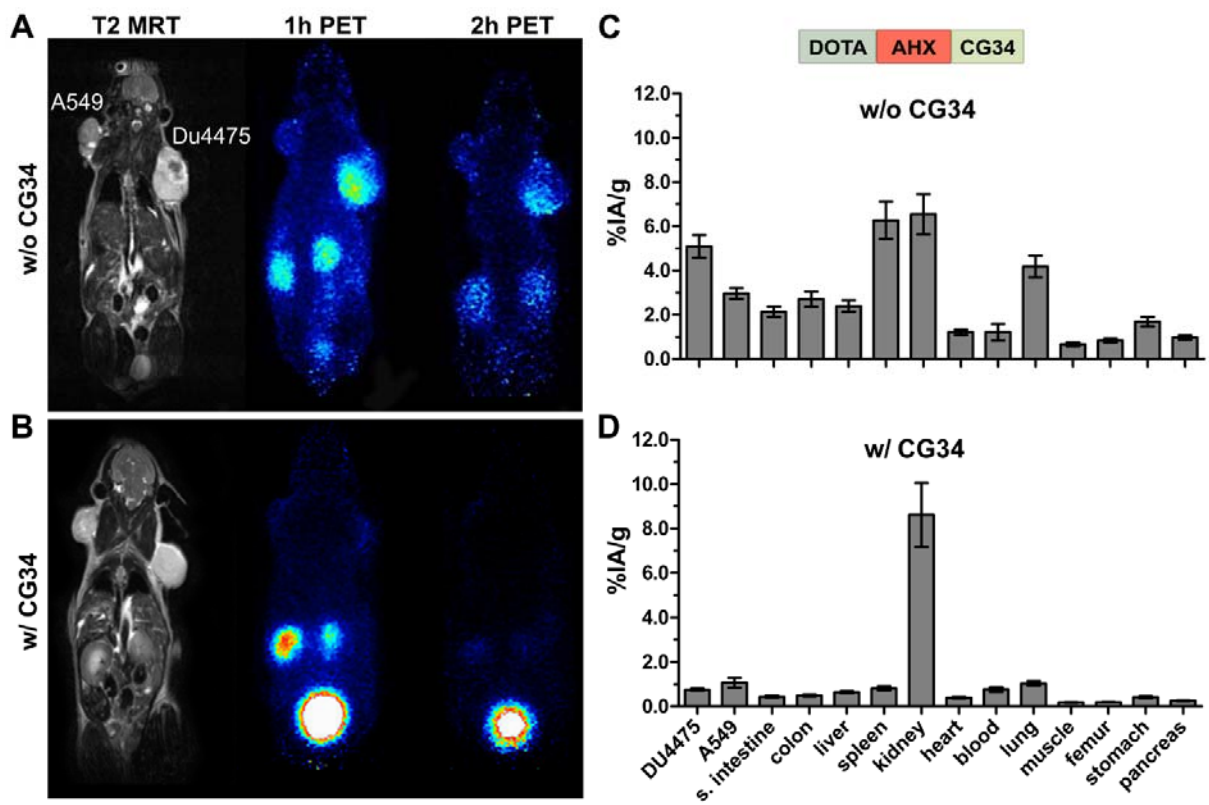

Source: http://biorxiv.org/content/10.1101/575902v1.full.pdf
